# Supplementary material for: Increasing seasonal variation in the extent of rivers and lakes from 1984 to 2022
Source: Copernicus journal article supplement (doi:10.5194/egusphere-2023-2147), 2023-10-04
Supplement: Supplementary file 1 [file egusphere-2023-2147-supplement.pdf]

**Supplementary Material:**  
**Increasing seasonal variation in the extent of rivers and lakes**  
**from 1984 to 2022**

Björn Nyberg<sup>1,2,3\*</sup>, Roger Sayre<sup>4</sup>, Elco Luijendijk<sup>1</sup>

Department of Earth Sciences, University of Bergen, Allegaten 41, 5020, Bergen, Norway.<sup>1</sup>

Bjerknes Centre for Climate Research, Allegaten 70, 5020, Bergen, Norway.<sup>2</sup>

7Analytics, Innovation District Solheimsviken 7c, 5054, Bergen, Norway<sup>3</sup>

U.S. Geological Survey, 516 National Center, Reston, VA, 20192, USA.<sup>4</sup>

## Supplementary Figures and Tables

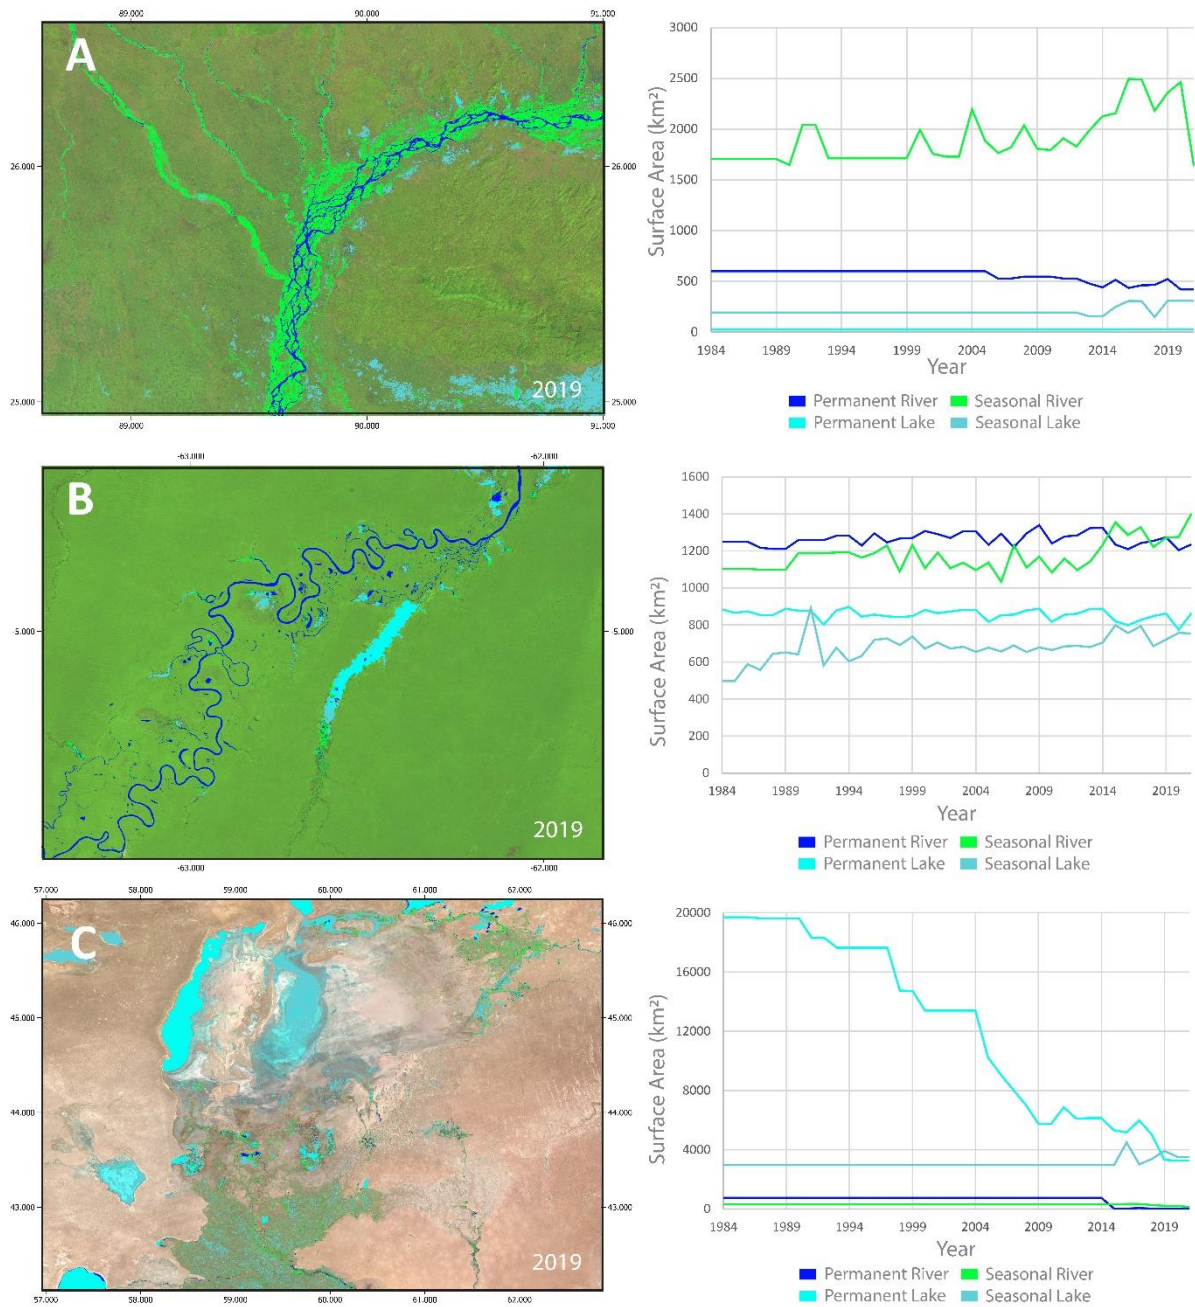

**Figure S1: Examples of Water Surface Area Change - Examples of the changing water surface area of lakes and rivers over the past 38-years subdivided in permanent and seasonal water extent. See interactive map for time-series images.**

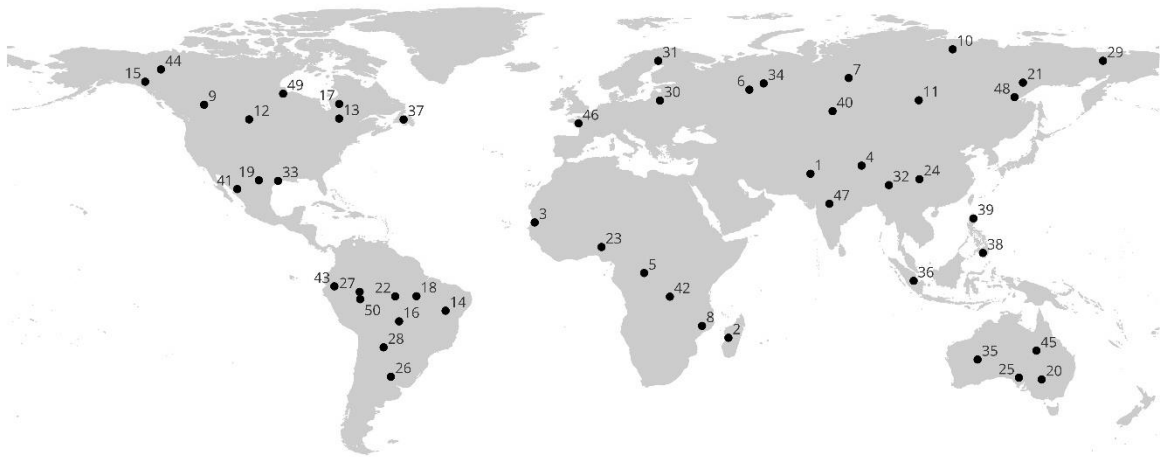

**Figure S2: Sampled Validation Localities - Location of the 50 random locations that were manually interpreted over the 38-year timeframe. Numbers show the unique ID that correspond to the table in supplementary table S1.**

**A**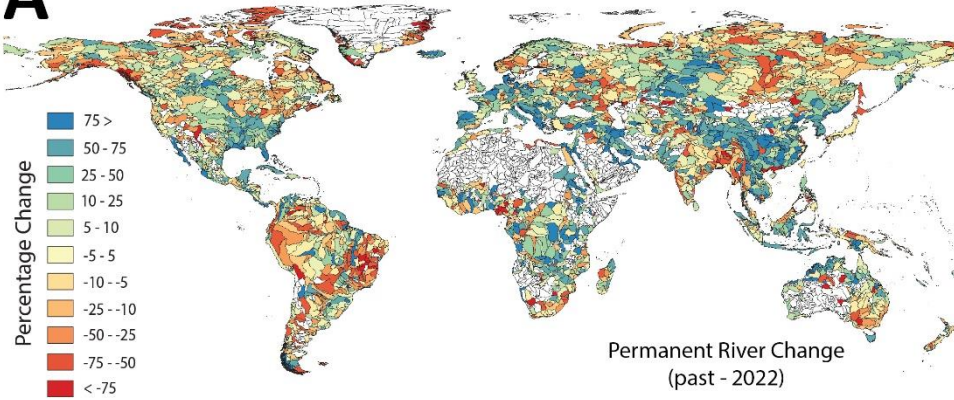**B**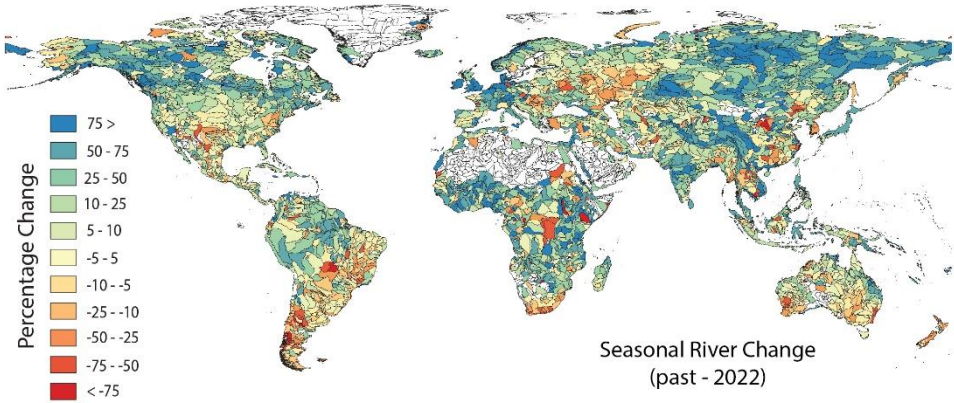**C**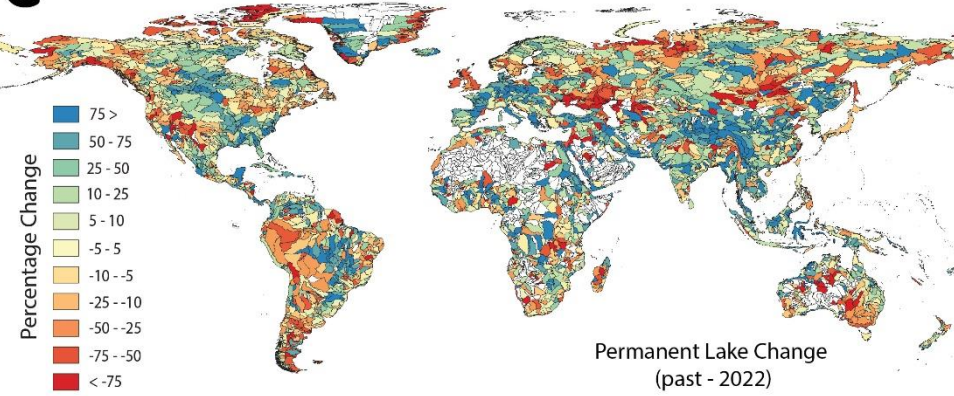**D**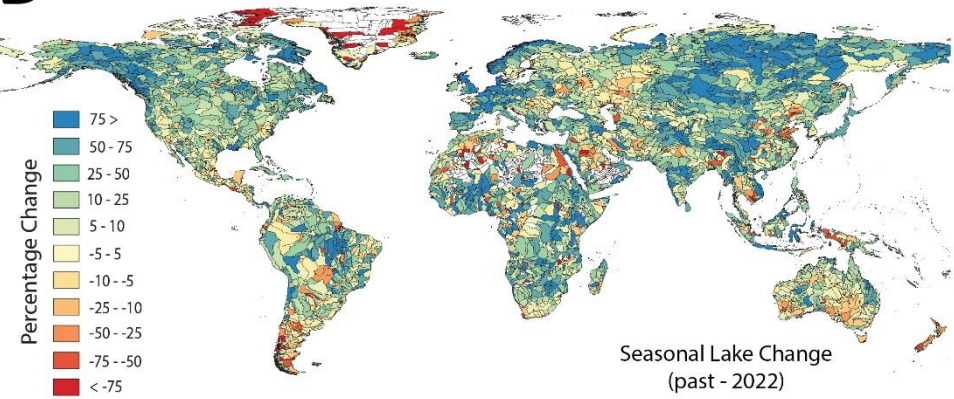

**Figure S3: The Distribution of Water Surface Area Change - The spatio-temporal change in permanent and seasonal water surface area of rivers and lakes from first recorded observations to 2022.**

**A**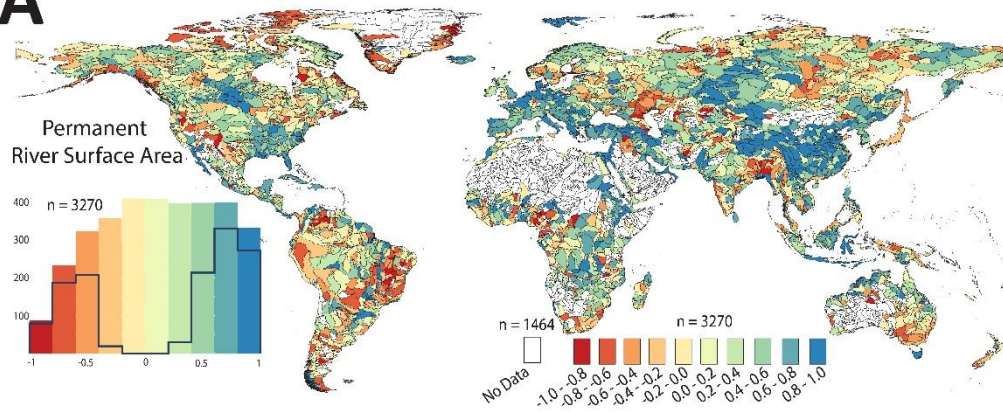**B**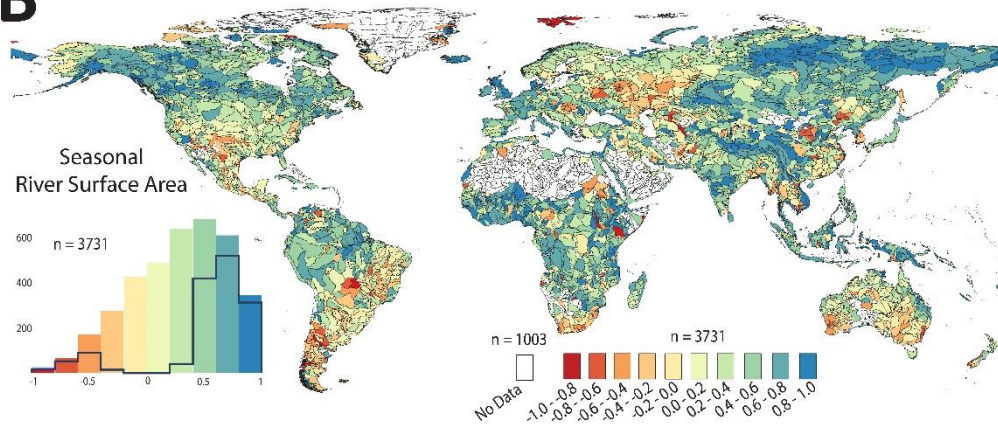**C**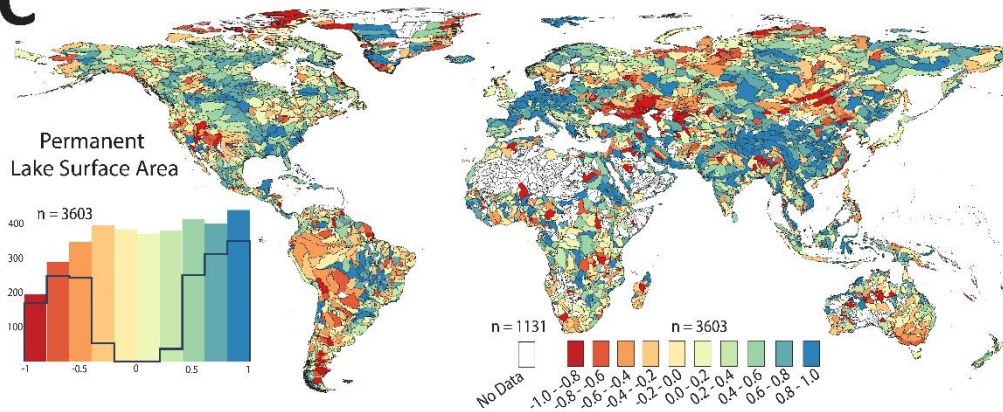**D**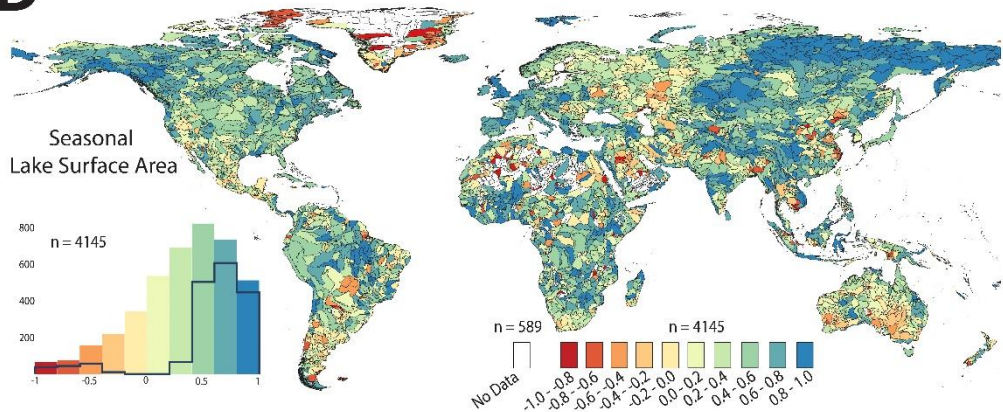

**Figure S4: Show maps of catchments with statistically significant change in seasonal and permanent water surface area since 1984 for rivers and lakes. Spearman rank correlations are shown ranging from -1 to 1. The histogram for each map shows the spearman correlations with the line indicating the distribution of the statistically significant samples (n > 9).**

**Table S1: Accuracy of Sampled Localities for 4 decades – Accuracy of the SARL database by locality in Figure S1 for the selected years of 1990, 2000, 2010 and 2020.**

| <b>ID</b> | <b>Lat</b> | <b>Long</b> | <b>1990</b> | <b>2000</b> | <b>2010</b> | <b>2020</b> |
|-----------|------------|-------------|-------------|-------------|-------------|-------------|
| 1         | 70.894     | 31.732      | 84.50       | 89.48       | 77.52       | 76.58       |
| 2         | 45.292     | -19.403     | 89.15       | 87.42       | 91.05       | 90.26       |
| 3         | -15.161    | 16.560      | 86.79       | 88.47       | 92.74       | 92.53       |
| 4         | 86.865     | 34.271      | 96.27       | 95.28       | 93.40       | 88.20       |
| 5         | 18.991     | 0.785       |             | 99.80       | 99.74       | 99.62       |
| 6         | 51.818     | 57.946      | 68.33       | 89.24       | 93.31       | 78.31       |
| 7         | 82.833     | 61.577      | 95.92       | 98.36       | 98.14       | 95.99       |
| 8         | 37.058     | -15.690     | 98.91       | 98.96       | 99.07       | 94.79       |
| 9         | -118.343   | 53.260      | 90.79       | 91.86       | 90.99       | 90.76       |
| 10        | 115.271    | 70.535      |             | 91.40       | 92.03       | 91.81       |
| 11        | 104.699    | 54.645      | 66.46       | 65.77       | 65.68       | 66.01       |
| 12        | -104.278   | 48.685      | 97.36       | 97.34       | 96.48       | 96.64       |
| 13        | -76.205    | 48.936      | 99.48       | 99.51       | 99.49       | 99.47       |
| 14        | -42.990    | -10.964     | 90.79       | 91.64       | 90.23       | 91.29       |
| 15        | -136.732   | 60.437      | 95.82       | 96.80       | 96.23       | 95.59       |
| 16        | -57.497    | -14.276     | 85.13       | 89.38       | 87.55       | 79.40       |
| 17        | -76.198    | 53.523      | 99.63       | 99.77       | 99.67       | 99.66       |
| 18        | -52.084    | -6.434      | 98.23       | 98.38       | 98.38       | 97.92       |
| 19        | -101.260   | 29.691      | 96.07       | 96.84       | 97.14       | 97.25       |
| 20        | 143.060    | -32.410     | 70.67       | 76.40       | 72.57       | 77.59       |
| 21        | 137.212    | 60.154      |             | 85.20       | 86.42       | 82.34       |
| 22        | -58.713    | -6.511      | 99.49       | 99.51       | 99.51       | 99.48       |
| 23        | 5.667      | 8.902       |             | 92.97       | 94.58       | 95.83       |
| 24        | 104.919    | 30.056      | 98.02       | 97.62       | 97.11       | 96.55       |
| 25        | 135.950    | -31.859     | 99.70       | 99.62       | 99.65       | 99.71       |
| 26        | -60.033    | -31.538     | 76.25       | 74.60       | 75.25       | 76.04       |
| 27        | -69.799    | -5.097      | 95.28       | 95.67       | 95.69       | 96.12       |
| 28        | -62.332    | -22.368     | 98.73       | 91.80       | 93.01       | 96.23       |
| 29        | 162.189    | 66.953      |             | 98.70       | 98.91       | 97.90       |
| 30        | 23.939     | 54.574      | 91.59       | 92.20       | 91.83       | 91.56       |
| 31        | 23.377     | 66.951      | 84.94       | 84.46       | 84.91       | 84.66       |
| 32        | 95.372     | 28.205      | 97.39       | 99.01       | 98.73       | 99.23       |
| 33        | -95.283    | 29.537      | 87.49       | 86.66       | 86.02       | 85.39       |
| 34        | 56.299     | 59.916      | 91.85       | 91.12       | 93.39       | 90.87       |
| 35        | 123.057    | -26.172     | 91.37       | 91.91       | 92.53       | 80.77       |
| 36        | 103.097    | -1.632      | 94.41       | 94.52       | 98.91       | 92.03       |
| 37        | -56.085    | 48.638      | 99.31       | 99.15       | 99.34       | 99.13       |
| 38        | 124.712    | 7.056       |             | 80.51       | 84.00       | 82.01       |
| 39        | 121.756    | 17.828      | 97.04       | 96.90       | 97.12       | 94.13       |

|           |          |         |       |       |       |       |
|-----------|----------|---------|-------|-------|-------|-------|
| <b>40</b> | 77.791   | 51.266  | 97.05 | 96.39 | 96.26 | 94.97 |
| <b>41</b> | -108.008 | 26.964  | 85.24 | 93.54 | 93.51 | 92.17 |
| <b>42</b> | 27.017   | -6.580  | 93.67 | 95.52 | 95.70 | 92.64 |
| <b>43</b> | -77.695  | -3.356  | 96.72 | 97.34 | 98.32 | 97.49 |
| <b>44</b> | -131.809 | 64.267  | 49.04 | 50.65 | 51.02 | 50.57 |
| <b>45</b> | 141.417  | -23.426 | 86.32 | 89.10 | 89.11 | 86.47 |
| <b>46</b> | -1.515   | 47.446  | 97.67 | 96.78 | 96.57 | 96.46 |
| <b>47</b> | 76.800   | 22.362  | 92.86 | 93.84 | 89.54 | 88.21 |
| <b>48</b> | 134.582  | 55.612  |       | 72.17 | 73.79 | 70.74 |
| <b>49</b> | -93.701  | 56.710  | 98.44 | 98.50 | 98.51 | 98.41 |
| <b>50</b> | -69.636  | -7.377  | 74.56 | 76.94 | 78.91 | 78.47 |
